# Supplementary material for: A Mo-doped TiNb2O7 anode for lithium-ion batteries with high rate capability due to charge redistribution
Source: Royal Society of Chemistry journal article supplement (doi:10.1039/c5cc02221e), 2015-01-01
Supplement: c5cc02221e1.pdf [file c5cc02221e1.pdf]

*Supporting Information*

**Mo-doped  $\text{TiNb}_2\text{O}_7$  anode for lithium-ion batteries with high rate capability due to charge redistribution**

Hannah Song<sup>a</sup> and Yong-Tae Kim<sup>\*a</sup>

Department of Energy System, Pusan National University, Busan 609-735, Republic of Korea.

## Experimental

*Synthesis:* TNO ( $\text{TiNb}_2\text{O}_7$ ) and Mo-TNO ( $\text{Ti}_{0.95}\text{Mo}_{0.05}\text{Nb}_2\text{O}_7$ ) were synthesized by a conventional sol-gel method. Starting reagents  $\text{Ti}(\text{OC}_4\text{H}_9)_4$  and  $\text{Nb}(\text{OC}_2\text{H}_5)_5$  (with a 1:2 and 0.95:2 molar ratio, respectively) were dissolved in ethanol and acetic acid with vigorous stirring for 5 h. After stirring, the solution was oven-dried overnight. The obtained powder was mixed with  $\text{MoO}_3$  using a ball-mill and the ground powders were heat-treated at 1000 °C for 5 h in air.

*Characterization:* The phase compositions and crystal structures of the synthesized powders were characterized by XRD between 10 and 90° ( $2\theta$ ) using a D8 Discover with a 45 kV acceleration voltage and 0.650 mA tube current. Scanning electron microscope (SEM) images were obtained using a HITACHI S-4100 with an acceleration voltage of 5 kV. The electronic conductivities and mobilities were measured using a Hall effect measurement system (HMS 5000, Ecopia) using the van der Pauw method (i.e., four-point probe measurement) with sample powders pressed into pellets at a 10 ton pressure. The XPS spectra were recorded on a PHI 5000 VersaProbe system using a monochromated Al  $K\alpha$  X-ray beam. Charge correction was performed using the C 1s peak (284.6 eV) as the reference; a Shirley background subtraction was applied to all XPS data. All peaks were fitted with a Gaussian–Lorentzian function to deconvolute overlapping peaks. The spin polarized PDOS calculations were performed using the CASTEP code.<sup>1</sup> The occupied states of the electrons were calculated using the Perdew-Wang 1991 (PW91) functional, based on the generalized gradient approximation (GGA).<sup>2</sup> To improve the GGA approach, the intra-atomic Coulomb interaction was modified through the LDA+U formalism, and the smearing factor was set to 0.02 eV. The supercell with two unit cells arranged along the b-direction (120 atoms) is employed in our calculations. 12 Ti atoms, 24 Nb atoms, and 84 O atoms were employed in the calculation for TNO. One of the

Ti atoms situated in 4i site was substituted with Mo atom in the calculation for Mo-TNO (11 Ti atoms, 1 Mo atom, 24 Nb atoms, and 84 O atoms).

*Battery Tests:* The sample electrodes were prepared with the active material, acetylene black, and polyvinyl difluoride (PVDF), mixed at a weight ratio of 70:20:10. The slurry was coated on a Cu foil and vacuum-dried at 75 °C for 24 h. A microporous polyethylene membrane was used as a separator, and 1 M LiPF<sub>6</sub> in ethylene carbonate (EC) and dimethyl carbonate (DMC) (1:1 v/v) was used as the electrolyte. The coin cells (CR2032) were assembled with a Li foil on a Cu mesh as the counter and reference electrode in a glove-box filled with Ar gas. The charge and discharge tests were carried out on a standard battery cycler (WonATech) at different C-rates in the potential range of 1.0–3.0 V (vs Li<sup>+</sup>/Li). Full cell tests were performed with the LiMn<sub>2</sub>O<sub>4</sub> (Sigma Aldrich) cathode in the potential range of 1.6–2.8 V at various C-rates (1C is assumed as 150 mAh/g as previously reported).<sup>3</sup> The diffusion coefficients of the Li ions in all samples were measured using a galvanostatic intermittent titration technique (GITT).<sup>4</sup> EIS measurements were also carried out using the VMP3 (Biologic science instruments) over the half cells. The frequency range was 100 MHz to 1 Hz with an amplitude of 10 mV.

## References

1. M. D. Segall, J. D. L. Philip, M. J. Probert, C. J. Pickard, P. J. Hasnip, S. J. Clark and M. C. Payne, *J. Phys. Condens. Matter*, 2002, 14, 2717.
2. J. P. Perdew, J. A. Chevary, S. H. Vosko, K. A. Jackson, M. R. Pederson, D. J. Singh and C. Fiolhais, *Phys. Rev. B*, 1992, 46, 6671-6687.
3. S. Jayaraman, V. Aravindan, P. Suresh Kumar, W. Chui Ling, S. Ramakrishna and S. Madhavi, *ACS Applied Materials & Interfaces*, 2014, DOI: 10.1021/am501464d.
4. W. Weppner and R. A. Huggins, *J. Electrochem. Soc.*, 1977, 124, 1569-1578.

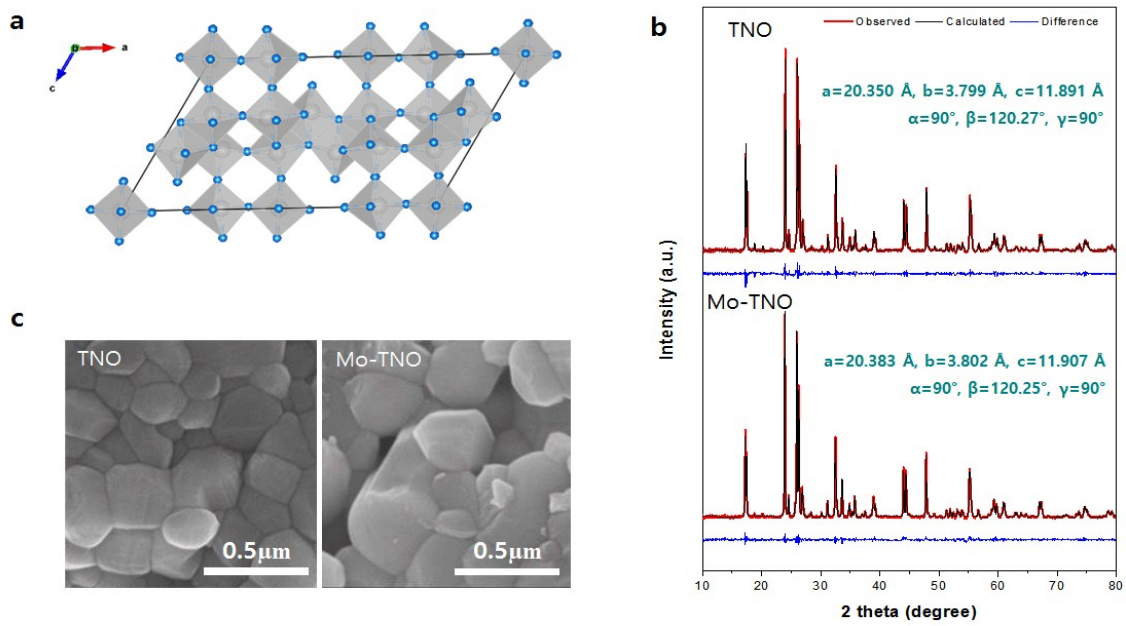

**Figure S1.** (a) TNO unit cell, (b) XRD patterns (observed: red lines, calculated: black lines, difference: blue lines), and Rietveld refinement profiles of the TNO and Mo-TNO, and (c) SEM images of the TNO and Mo-TNO.

---

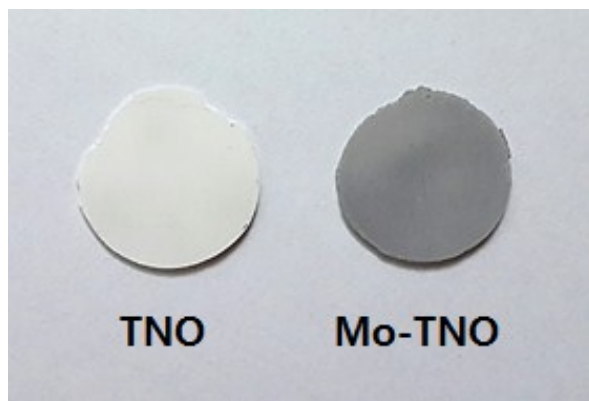

**Figure S2.** Sample colour of TNO and Mo-TNO

---

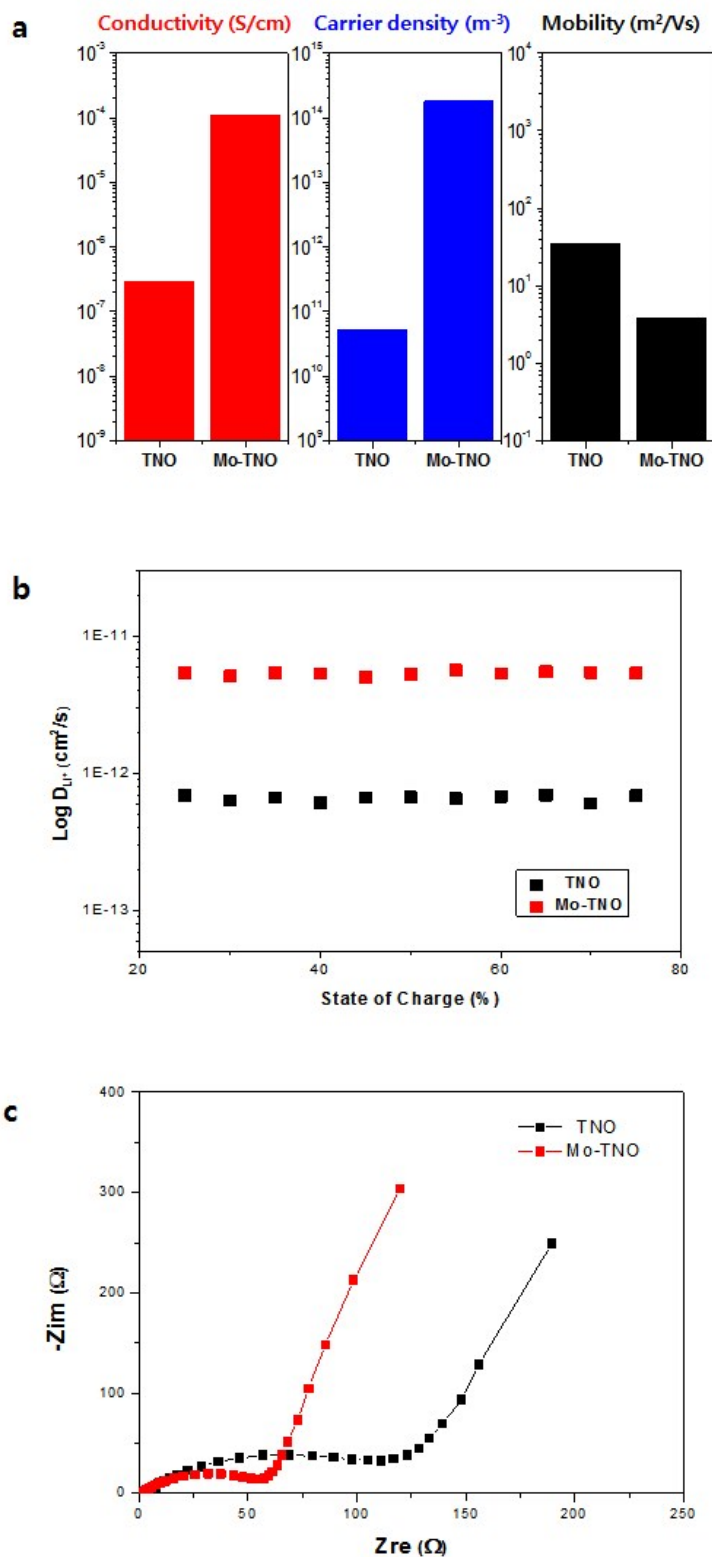

**Figure S3.** (a) Electronic conductivity (red bars), carrier density (blue bars), and mobility (black bars) of TNO and Mo-TNO. (b) Diffusion coefficients of TNO (black squares) and Mo-TNO (red squares). (c) Nyquist plots of TNO (black squares) and Mo-TNO (red squares) over the frequency range 100 MHz to 0.01 Hz.

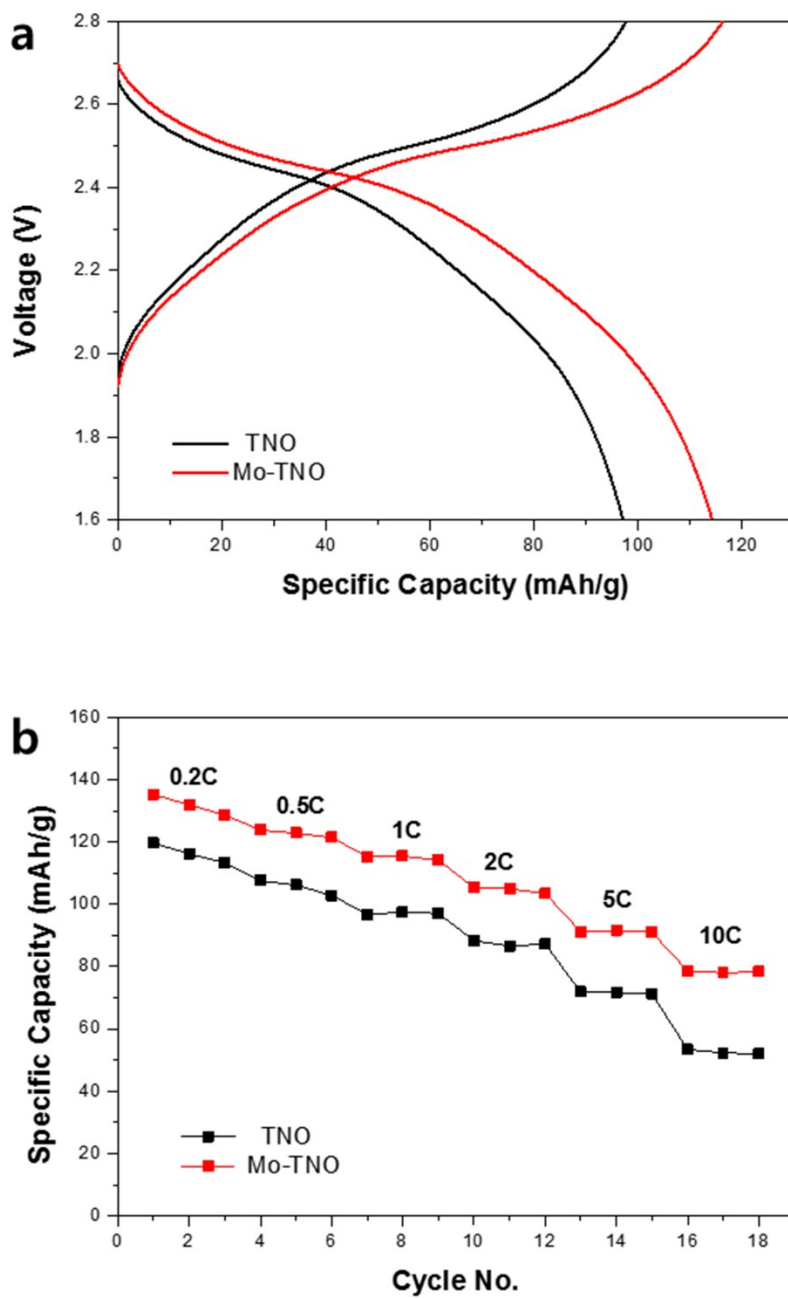

**Figure S4.** (a) Representative galvanostatic charge-discharge curves at 1C and (b) rate capabilities of full-cells.

**Table S1. Lattice Parameters obtained by Rietveld Refinement**

| <b>Sample</b>                  | <b>TNO</b> | <b>Mo-TNO</b> |
|--------------------------------|------------|---------------|
| <b>a / Å</b>                   | 20.350(0)  | 20.383(0)     |
| <b>b / Å</b>                   | 3.799(0)   | 3.802(1)      |
| <b>c / Å</b>                   | 11.891(1)  | 11.907(0)     |
| <b><math>\alpha</math> / °</b> | 90         | 90            |
| <b><math>\beta</math> / °</b>  | 120.27(1)  | 120.25(0)     |
| <b><math>\gamma</math> / °</b> | 90         | 90            |
| <b>R<sub>wp</sub> / %</b>      | 6.68       | 6.50          |
| <b>GOF</b>                     | 1.5        | 1.4           |
